# Supplementary material for: No evidence for a common blood microbiome based on a population study of 9,770 healthy humans
Source: Research Square preprint supplement (doi:10.21203/rs.3.rs-1958021/v1), 2022-09-01
Supplement: Supplementary file 3 [file 3f6830520802f2043051bc57.xlsx]

## Sheet: Detected Species
Species	Maximum read count assigned	Prevalence	Detected in how many samples?	Organism type	Assigned body site	Microbiological classification
Fusobacterium nucleatum	194199	0.00112461	10	Bacteria	gut	Obligate anaerobe
Fusobacterium nucleatum	194199	0.00112461	10	Bacteria	oral	Obligate anaerobe
Fusobacterium nucleatum	194199	0.00112461	10	Bacteria	genitourinary tract	Obligate anaerobe
Cutibacterium acnes	22596	0.0474584	422	Bacteria	skin	Aerotolerant anaerobe
Human mastadenovirus C	17475	0.0187809	167	Viruses	blood	Obligate intracellular
Neisseria subflava	15385	0.00157445	14	Bacteria	gut	Aerobic
Neisseria subflava	15385	0.00157445	14	Bacteria	oral	Aerobic
Corynebacterium segmentosum	14476	0.00101215	9	Bacteria		Aerobic
Haemophilus parainfluenzae	12183	0.00202429	18	Bacteria	gut	Facultative anaerobe
Haemophilus parainfluenzae	12183	0.00202429	18	Bacteria	respiratory tract	Facultative anaerobe
Haemophilus parainfluenzae	12183	0.00202429	18	Bacteria	oral	Facultative anaerobe
Haemophilus parainfluenzae	12183	0.00202429	18	Bacteria	blood	Facultative anaerobe
Fannyhessea vaginae	10395	0.00236167	21	Bacteria	genitourinary tract	Obligate anaerobe
Staphylococcus epidermidis	9140	0.00854701	76	Bacteria	gut	Facultative anaerobe
Staphylococcus epidermidis	9140	0.00854701	76	Bacteria	skin	Facultative anaerobe
Staphylococcus epidermidis	9140	0.00854701	76	Bacteria	respiratory tract	Facultative anaerobe
Staphylococcus epidermidis	9140	0.00854701	76	Bacteria	eye	Facultative anaerobe
Staphylococcus epidermidis	9140	0.00854701	76	Bacteria	oral	Facultative anaerobe
Human betaherpesvirus 6A	8770	0.00202429	18	Viruses	blood	Obligate intracellular
Human betaherpesvirus 6B	8476	0.00348628	31	Viruses	blood	Obligate intracellular
Aspergillus oryzae	7909	0.000562303	5	Fungi		Aerobic
Lactobacillus crispatus	7799	0.0105713	94	Bacteria	genitourinary tract	Aerotolerant anaerobe
Lactobacillus crispatus	7799	0.0105713	94	Bacteria	oral	Aerotolerant anaerobe
Lactobacillus crispatus	7799	0.0105713	94	Bacteria	gut	Aerotolerant anaerobe
Acinetobacter baumannii	7673	0.0031489	28	Bacteria	oral	Aerobic
Cupriavidus metallidurans	5506	0.00359874	32	Bacteria		Aerobic
Hepatitis B virus	4979	0.000337382	3	Viruses	blood	Obligate intracellular
Neisseria mucosa	4683	0.00123707	11	Bacteria	oral	Aerobic
Malassezia restricta	4237	0.00112461	10	Fungi	gut	Aerobic
Malassezia restricta	4237	0.00112461	10	Fungi	skin	Aerobic
Neisseria flavescens	3787	0.000562303	5	Bacteria	oral	Aerobic
Fusobacterium pseudoperiodonticum	3638	0.000449843	4	Bacteria		Obligate anaerobe
Prevotella melaninogenica	3549	0.00112461	10	Bacteria	oral	Obligate anaerobe
Prevotella melaninogenica	3549	0.00112461	10	Bacteria	gut	Obligate anaerobe
Prevotella melaninogenica	3549	0.00112461	10	Bacteria	skin	Obligate anaerobe
Prevotella melaninogenica	3549	0.00112461	10	Bacteria	respiratory tract	Obligate anaerobe
Prevotella melaninogenica	3549	0.00112461	10	Bacteria	genitourinary tract	Obligate anaerobe
Rickettsia sp. Tillamook 23	2923	0.000224921	2	Bacteria		Obligate intracellular
Prevotella sp. oral taxon 299	2518	0.000224921	2	Bacteria		Obligate anaerobe
Moraxella osloensis	2402	0.0191183	170	Bacteria	skin	Aerobic
Gardnerella vaginalis	2123	0.00843455	75	Bacteria	genitourinary tract	Facultative anaerobe
Gardnerella vaginalis	2123	0.00843455	75	Bacteria	oral	Facultative anaerobe
Gardnerella vaginalis	2123	0.00843455	75	Bacteria	gut	Facultative anaerobe
Corynebacterium imitans	1976	0.000224921	2	Bacteria		Aerobic
Mycolicibacterium aubagnense	1938	0.0121457	108	Bacteria		Aerobic
Prevotella jejuni	1937	0.000337382	3	Bacteria	gut	Obligate anaerobe
Faecalibacterium prausnitzii	1845	0.00449843	40	Bacteria	gut	Obligate anaerobe
Faecalibacterium prausnitzii	1845	0.00449843	40	Bacteria	genitourinary tract	Obligate anaerobe
Rothia mucilaginosa	1729	0.00191183	17	Bacteria	oral	Aerobic
Rothia mucilaginosa	1729	0.00191183	17	Bacteria	gut	Aerobic
Rothia mucilaginosa	1729	0.00191183	17	Bacteria	skin	Aerobic
Rothia mucilaginosa	1729	0.00191183	17	Bacteria	respiratory tract	Aerobic
Neisseria elongata	1488	0.000562303	5	Bacteria	oral	Aerobic
Phocaeicola vulgatus	1476	0.00359874	32	Bacteria		Obligate anaerobe
Prevotella intermedia	1344	0.00123707	11	Bacteria	oral	Obligate anaerobe
Prevotella intermedia	1344	0.00123707	11	Bacteria	skin	Obligate anaerobe
Roseomonas mucosa	1305	0.000787224	7	Bacteria		Aerobic
Neisseria meningitidis	1166	0.000224921	2	Bacteria	gut	Aerobic
Neisseria meningitidis	1166	0.000224921	2	Bacteria	oral	Aerobic
Rickettsia felis	1123	0.000224921	2	Bacteria		Obligate intracellular
Schaalia odontolytica	1117	0.000562303	5	Bacteria		Obligate anaerobe
Lactobacillus iners	1104	0.0119208	106	Bacteria	genitourinary tract	Aerotolerant anaerobe
Lactobacillus iners	1104	0.0119208	106	Bacteria	gut	Aerotolerant anaerobe
Veillonella parvula	953	0.00101215	9	Bacteria	oral	Obligate anaerobe
Veillonella parvula	953	0.00101215	9	Bacteria	gut	Obligate anaerobe
Veillonella parvula	953	0.00101215	9	Bacteria	genitourinary tract	Obligate anaerobe
Cutibacterium granulosum	950	0.000562303	5	Bacteria		Aerotolerant anaerobe
Skermanella sp. TT6	940	0.000787224	7	Bacteria		Aerobic
Bifidobacterium longum	870	0.00506073	45	Bacteria	gut	Obligate anaerobe
Bifidobacterium longum	870	0.00506073	45	Bacteria	genitourinary tract	Obligate anaerobe
Bifidobacterium longum	870	0.00506073	45	Bacteria	oral	Obligate anaerobe
Bifidobacterium longum	870	0.00506073	45	Bacteria	skin	Obligate anaerobe
Bifidobacterium longum	870	0.00506073	45	Bacteria	respiratory tract	Obligate anaerobe
Phocaeicola dorei	865	0.00202429	18	Bacteria		Obligate anaerobe
Prevotella oris	842	0.000224921	2	Bacteria	oral	Obligate anaerobe
Deinococcus radiodurans	750	0.000674764	6	Bacteria		Aerobic
Deinococcus sp. NW-56	731	0.000337382	3	Bacteria		Aerobic
Rubrobacter xylanophilus	728	0.00438597	39	Bacteria		Aerobic
Streptococcus mitis	702	0.00269906	24	Bacteria	oral	Facultative anaerobe
Streptococcus mitis	702	0.00269906	24	Bacteria	respiratory tract	Facultative anaerobe
Streptococcus mitis	702	0.00269906	24	Bacteria	gut	Facultative anaerobe
Streptococcus mitis	702	0.00269906	24	Bacteria	genitourinary tract	Facultative anaerobe
Veillonella nakazawae	699	0.000224921	2	Bacteria		Obligate anaerobe
Corynebacterium kefirresidentii	653	0.00202429	18	Bacteria		Aerobic
Bifidobacterium bifidum	649	0.00461089	41	Bacteria	gut	Obligate anaerobe
Bifidobacterium bifidum	649	0.00461089	41	Bacteria	genitourinary tract	Obligate anaerobe
Neisseria sicca	636	0.00112461	10	Bacteria		Aerobic
Streptococcus oralis	591	0.00157445	14	Bacteria	oral	Facultative anaerobe
Streptococcus oralis	591	0.00157445	14	Bacteria	gut	Facultative anaerobe
Rothia kristinae	588	0.000224921	2	Bacteria		Aerobic
Bifidobacterium breve	577	0.00382366	34	Bacteria	gut	Obligate anaerobe
Bifidobacterium breve	577	0.00382366	34	Bacteria	oral	Obligate anaerobe
Bifidobacterium breve	577	0.00382366	34	Bacteria	genitourinary tract	Obligate anaerobe
Paracoccus haeundaensis	571	0.000224921	2	Bacteria		Aerobic
Lautropia mirabilis	535	0.00112461	10	Bacteria	oral	Facultative anaerobe
Lautropia mirabilis	535	0.00112461	10	Bacteria	gut	Facultative anaerobe
Comamonas aquatica	518	0.00157445	14	Bacteria		Aerobic
Deinococcus wulumuqiensis	516	0.000562303	5	Bacteria		Aerobic
Torque teno virus 6	496	0.000224921	2	Viruses	blood	Obligate intracellular
Streptococcus sp. oral taxon 061	492	0.00134953	12	Bacteria		Facultative anaerobe
Corynebacterium sp. zg-917	483	0.000337382	3	Bacteria		Aerobic
Skermanella pratensis	471	0.000224921	2	Bacteria		Aerobic
Propionibacterium sp. oral taxon 193	464	0.00438597	39	Bacteria		Obligate anaerobe
Rothia aeria	461	0.00123707	11	Bacteria	oral	Aerobic
Rothia dentocariosa	404	0.000787224	7	Bacteria	oral	Aerobic
Rothia dentocariosa	404	0.000787224	7	Bacteria	gut	Aerobic
Corynebacterium tuberculostearicum	399	0.0031489	28	Bacteria	respiratory tract	Aerobic
Ruminococcus gnavus	388	0.00202429	18	Bacteria	gut	Obligate anaerobe
Ruminococcus gnavus	388	0.00202429	18	Bacteria	genitourinary tract	Obligate anaerobe
Ruminococcus gnavus	388	0.00202429	18	Bacteria	skin	Obligate anaerobe
Vibrio anguillarum	379	0.000337382	3	Bacteria		Facultative anaerobe
Deinococcus gobiensis	378	0.000224921	2	Bacteria		Aerobic
Corynebacterium aurimucosum	344	0.000224921	2	Bacteria		Aerobic
Deinococcus geothermalis	338	0.000224921	2	Bacteria		Aerobic
Phyllobacterium zundukense	336	0.00933423	83	Bacteria		Aerobic
Acidovorax sp. KKS102	336	0.00730994	65	Bacteria		Aerobic
Rickettsia endosymbiont of Bemisia tabaci	334	0.000224921	2	Bacteria		Obligate intracellular
Staphylococcus hominis	330	0.000787224	7	Bacteria	skin	Facultative anaerobe
Corynebacterium ureicelerivorans	330	0.000449843	4	Bacteria		Aerobic
Ruminococcus torques	314	0.00123707	11	Bacteria	gut	Obligate anaerobe
Blautia obeum	314	0.00101215	9	Bacteria	gut	Obligate anaerobe
Staphylococcus capitis	312	0.00123707	11	Bacteria	oral	Facultative anaerobe
Staphylococcus capitis	312	0.00123707	11	Bacteria	skin	Facultative anaerobe
Corynebacterium jeikeium	304	0.00179937	16	Bacteria	gut	Aerobic
Pantoea ananatis	272	0.000562303	5	Bacteria		Facultative anaerobe
Epilithonimonas vandammei	266	0.00202429	18	Bacteria		Aerobic
Acinetobacter sp. FDAARGOS_724	260	0.000674764	6	Bacteria		Aerobic
Collinsella aerofaciens	259	0.00281152	25	Bacteria	gut	Obligate anaerobe
Collinsella aerofaciens	259	0.00281152	25	Bacteria	skin	Obligate anaerobe
Acinetobacter dispersus	257	0.00213675	19	Bacteria		Aerobic
Bifidobacterium catenulatum	252	0.000787224	7	Bacteria	gut	Obligate anaerobe
Lactobacillus jensenii	240	0.00191183	17	Bacteria	genitourinary tract	Aerotolerant anaerobe
Anaerostipes hadrus	231	0.00112461	10	Bacteria	gut	Obligate anaerobe
Bifidobacterium adolescentis	222	0.00596041	53	Bacteria	gut	Obligate anaerobe
Parabacteroides distasonis	221	0.000899685	8	Bacteria	gut	Obligate anaerobe
Parabacteroides distasonis	221	0.000899685	8	Bacteria	genitourinary tract	Obligate anaerobe
Parabacteroides distasonis	221	0.000899685	8	Bacteria	skin	Obligate anaerobe
Corynebacterium amycolatum	216	0.000224921	2	Bacteria		Aerobic
Streptococcus sanguinis	208	0.00112461	10	Bacteria	gut	Facultative anaerobe
Streptococcus sanguinis	208	0.00112461	10	Bacteria	oral	Facultative anaerobe
Streptococcus sanguinis	208	0.00112461	10	Bacteria	genitourinary tract	Facultative anaerobe
Acinetobacter schindleri	204	0.00269906	24	Bacteria		Aerobic
Corynebacterium matruchotii	192	0.000562303	5	Bacteria	gut	Aerobic
Corynebacterium matruchotii	192	0.000562303	5	Bacteria	oral	Aerobic
Deinococcus actinosclerus	190	0.000224921	2	Bacteria		Aerobic
Actinomyces sp. oral taxon 414	188	0.000337382	3	Bacteria		Facultative anaerobe
Coprococcus comes	183	0.00146199	13	Bacteria	gut	Obligate anaerobe
Streptococcus pneumoniae	176	0.00123707	11	Bacteria	oral	Facultative anaerobe
Streptococcus pneumoniae	176	0.00123707	11	Bacteria	respiratory tract	Facultative anaerobe
Streptococcus pneumoniae	176	0.00123707	11	Bacteria	gut	Facultative anaerobe
Staphylococcus warneri	171	0.000449843	4	Bacteria	oral	Facultative anaerobe
Staphylococcus warneri	171	0.000449843	4	Bacteria	skin	Facultative anaerobe
Deinococcus ficus	171	0.000224921	2	Bacteria		Aerobic
Deinococcus swuensis	161	0.000224921	2	Bacteria		Aerobic
Cutibacterium avidum	157	0.000787224	7	Bacteria		Aerotolerant anaerobe
Staphylococcus aureus	150	0.00123707	11	Bacteria	skin	Facultative anaerobe
Staphylococcus aureus	150	0.00123707	11	Bacteria	gut	Facultative anaerobe
Staphylococcus aureus	150	0.00123707	11	Bacteria	respiratory tract	Facultative anaerobe
Staphylococcus aureus	150	0.00123707	11	Bacteria	oral	Facultative anaerobe
Clostridium innocuum	148	0.000899685	8	Bacteria	gut	Obligate anaerobe
Dermacoccus nishinomiyaensis	148	0.000224921	2	Bacteria		Aerobic
Streptococcus sp. oral taxon 431	147	0.000562303	5	Bacteria		Facultative anaerobe
Anaerobutyricum hallii	142	0.000674764	6	Bacteria		Obligate anaerobe
Gemella haemolysans	128	0.000562303	5	Bacteria	oral	Facultative anaerobe
Gemella haemolysans	128	0.000562303	5	Bacteria	gut	Facultative anaerobe
Megasphaera elsdenii	124	0.000562303	5	Bacteria	gut	Obligate anaerobe
Megasphaera elsdenii	124	0.000562303	5	Bacteria	genitourinary tract	Obligate anaerobe
Limosilactobacillus reuteri	124	0.000224921	2	Bacteria		Obligate anaerobe
Corynebacterium genitalium	120	0.000337382	3	Bacteria		Aerobic
Roseomonas sp. FDAARGOS_362	118	0.000449843	4	Bacteria		Aerobic
Pseudonocardia autotrophica	118	0.000337382	3	Bacteria		Aerobic
Porphyromonas gingivalis	107	0.000562303	5	Bacteria	oral	Obligate anaerobe
Porphyromonas gingivalis	107	0.000562303	5	Bacteria	gut	Obligate anaerobe
Porphyromonas gingivalis	107	0.000562303	5	Bacteria	genitourinary tract	Obligate anaerobe
Bifidobacterium pseudocatenulatum	104	0.000449843	4	Bacteria	oral	Obligate anaerobe
Bifidobacterium pseudocatenulatum	104	0.000449843	4	Bacteria	gut	Obligate anaerobe
Blautia sp. SC05B48	101	0.00134953	12	Bacteria		Obligate anaerobe
Acidovorax sp. JMULE5	101	0.000562303	5	Bacteria		Aerobic

## Sheet: Legend
Legend
Column name	Description
Maximum read count assigned	The maximum number of read pairs assigned by Kraken2 to a single sample.
Detected in how many samples?	The number of samples where said microbial species was detected (x)
Prevalence	The proportion of samples where said microbial species was detected (i.e., prevalence=x/8828).
Assigned body site	Originating body sites of the microbial species as derived from the Disbiome database. Blank values indicate that the microbial species was not found in the Disbiome database and hence could not be assigned a body site.
Microbiological classification	Growth requirements of the microbial species based on a clinical microbiology textbook [69] and based on Google Scholar searches. Viruses were classified as obligate intracellular.
