# Supplementary material for: No evidence for a common blood microbiome based on a population study of 9,770 healthy humans
Source: Research Square preprint supplement (doi:10.21203/rs.3.rs-1958021/v1), 2022-09-01
Supplement: Supplementary file 7 [file c651d3032494dec97e4e3134.xlsx]

## Sheet: Supplementary Table 8
Species	Accession	Analysis
Yersinia enterocolitica	GCF_001160345.1	Simulation
Leclercia adecarboxylata	GCF_001518835.1	Simulation
Moraxella osloensis	GCF_001553955.1	Simulation
Streptococcus pneumoniae	GCF_002076835.1	Simulation
Pasteurella multocida	GCF_003061265.1	Simulation
Staphylococcus epidermidis	GCF_006094375.1	Simulation
Actinomyces viscosus	GCF_900637975.1	Simulation
Torque teno virus	NC_015783.1	Simulation
Human betaherpesvirus 6A	NC_001664.4	Simulation
Candida albicans	GCF_000182965.3	Simulation
Human betaherpesvirus 6B	NC_000898.1	Coverage breadth
Human betaherpesvirus 6A	NC_001664.4	Coverage breadth
Torque teno virus 6	NC_014094.1	Coverage breadth
Human mastadenovirus C	NC_001405.1	Coverage breadth
Hepatitis B virus	JX661488.1	Coverage breadth
Achromobacter xylosoxidans	NZ_CP043820.1	Coverage breadth, iRep
Pseudomonas mendocina	NZ_CP013124.1	Coverage breadth, iRep
Alcaligenes faecalis	NZ_CP013119.1	Coverage breadth, iRep
Cutibacterium acnes	NC_021085.1	Coverage breadth, iRep
Rickettsia sp. Tillamook 23	NZ_CP060138.1	Coverage breadth, iRep
Neisseria subflava	NZ_CP039887.1	Coverage breadth, iRep
Acinetobacter baumannii	NZ_CP043953.1	Coverage breadth, iRep
Fannyhessea vaginae	NZ_UFSV01000001.1	Coverage breadth, iRep
Neisseria flavescens	NZ_CP039886.1	Coverage breadth, iRep
Staphylococcus epidermidis	NZ_CP035288.1	Coverage breadth, iRep
Haemophilus parainfluenzae	NZ_GL872339.1	Coverage breadth, iRep
Fusobacterium nucleatum	NZ_LN831027.1	Coverage breadth, iRep
Corynebacterium segmentosum	NZ_LR134408.1	Coverage breadth, iRep
Lactobacillus crispatus	NZ_CP039266.1	Coverage breadth, iRep
Fusobacterium pseudoperiodonticum	NZ_CP024702.1	Coverage breadth, iRep
Prevotella sp. oral taxon 299	NC_022124.1	Coverage breadth, iRep
Corynebacterium imitans	NZ_LT906467.1	Coverage breadth, iRep
Moraxella osloensis	NZ_CP014234.1	Coverage breadth, iRep
Gardnerella vaginalis	NZ_PKJK01000001.1	Coverage breadth, iRep
Prevotella melaninogenica	NC_014370.1	Coverage breadth, iRep
Mycolicibacterium aubagnense	NZ_AP022577.1	Coverage breadth, iRep
Cupriavidus metallidurans	NZ_FYAX01000013.1	Coverage breadth, iRep
Neisseria mucosa	NZ_UGRT01000001.1	Coverage breadth, iRep
Malassezia restricta	NC_040193.1	Coverage breadth
Aspergillus oryzae	NC_036435.1	Coverage breadth
Human reference genome GRCh38	GCF_000001405.39	Simulation, human read removal
